# Supplementary material for: Scalable Surveillance of E-Cigarette Products on Instagram and TikTok Using Computer Vision
Source: PubMed Central journal article supplement (PMC11033573; doi:10.1093/ntr/ntad224), 2023-11-08

 Ground truth

 Prediction

Intersection over Union (IoU) =  $\frac{\text{Overlap of Ground Truth \& Prediction}}{\text{Area of Union (Total Area)}}$



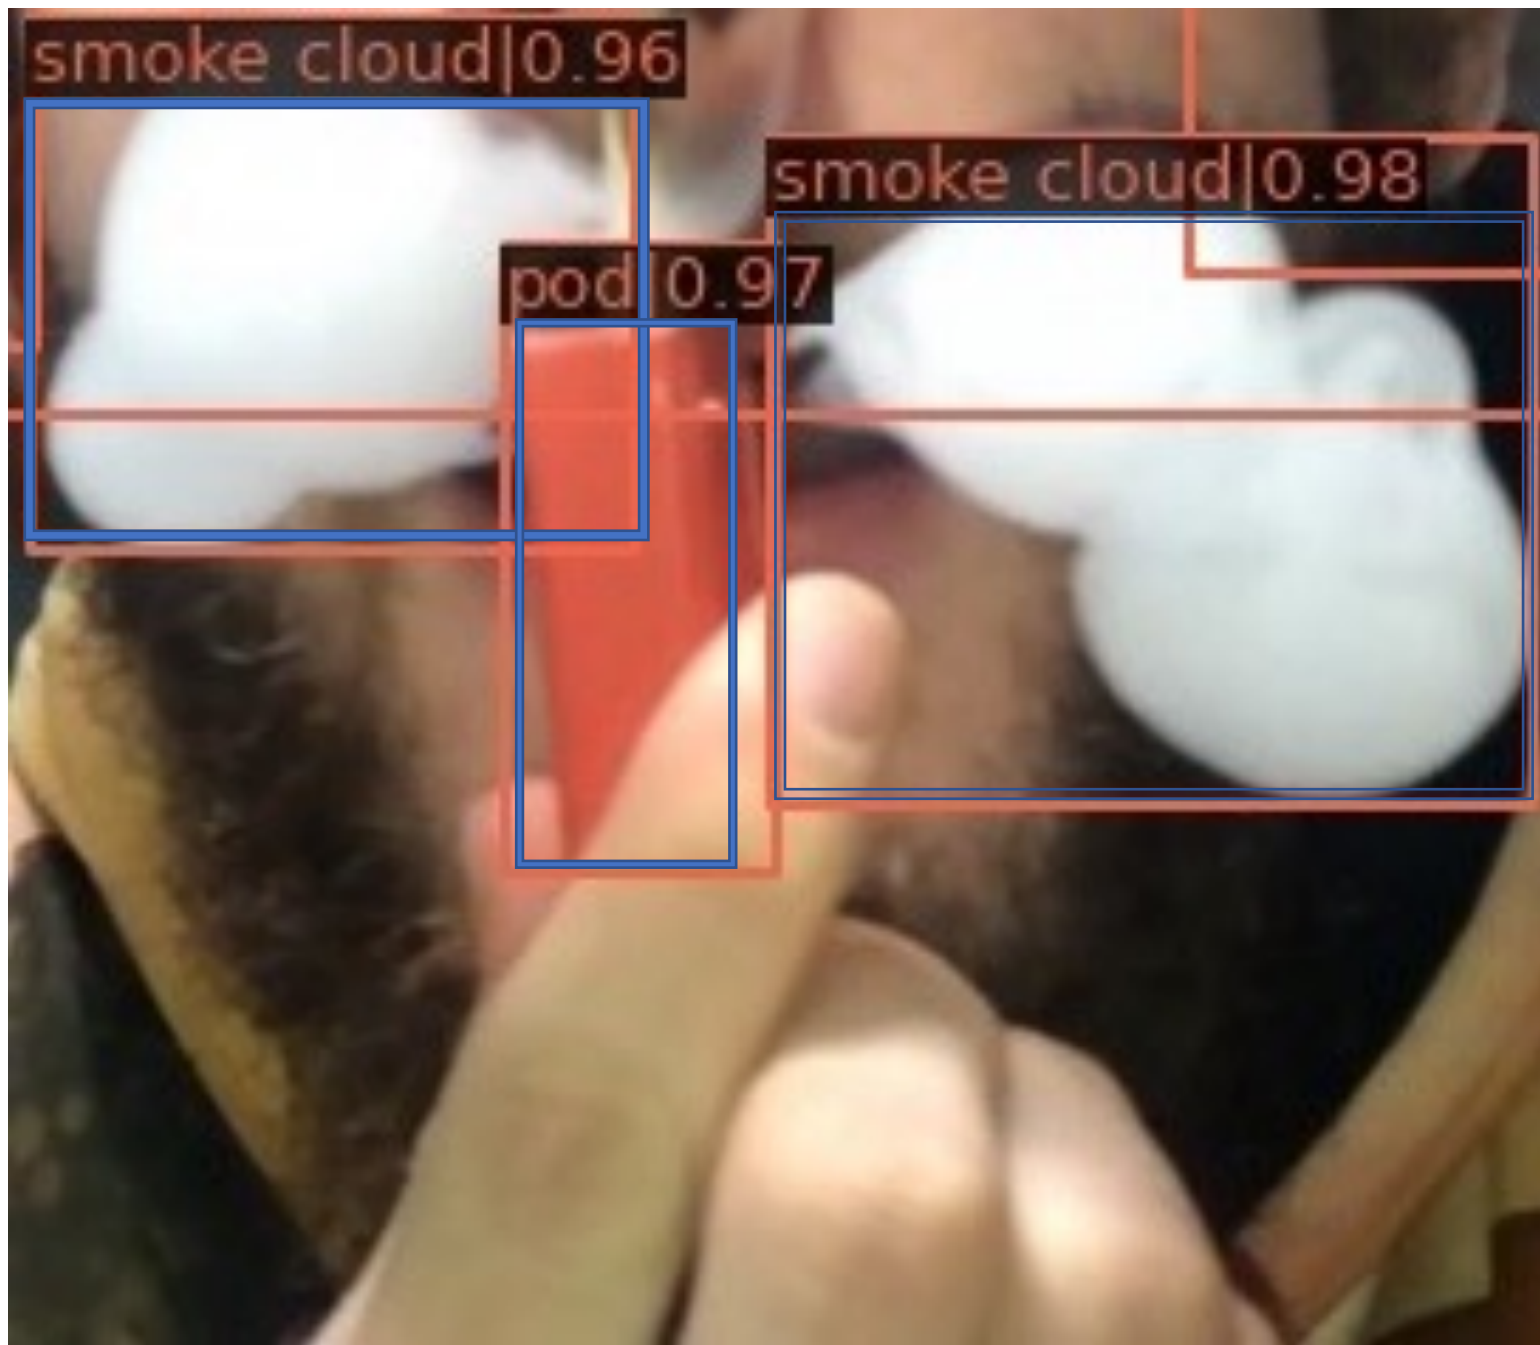

Supplement: ntad224_suppl_supplementary_figures_s1.pdf [file ntad224_suppl_supplementary_figures_s1.pdf]
